# Supplementary material for: Adoption of ARDU Moldboard Plough in Arsi and West Arsi Zones, Oromia Regional State, Ethiopia
Source: Research Square preprint supplement (doi:10.21203/rs.3.rs-4393589/v1), 2024-05-31
Supplement: Supplementary file 1 [file 81b72427056de331598a028f.docx]

**Supportive Tables**

Annex 1. Multi-collinearity test for continuous

| Variable | VIF | 1/VIF |
| --- | --- | --- |
| Experience in farming | 1.45 | 0.689 |
| District | 1.42 | 0.703 |
| Family size | 1.28 | 0.783 |
| Education (in grade) | 1.18 | 0.848 |
| Total cultivated land | 1.17 | 0.856 |
| Distance from ARDU plough suppliers | 1.08 | 0.923 |
| Distance from extension services | 1.06 | 0.941 |
| Total livestock holding (TLU) | 1.04 | 0.960 |
| **Mean VIF** | **1.21** |  |

Annex 2. Contingency coefficient test for dummy/category variables

| Variables | Credit access | Access plough | Extension access | Off-farm income |
| --- | --- | --- | --- | --- |
| Credit access | 1.0000 |  |  |  |
| Access plough | -0.0240 | 1.0000 |  |  |
| Extension access | -0.0847 | 0.1325 | 1.0000 |  |
| Off-farm income | 0.0144 | 0.1439 | -0.0206 | 1.0000 |
